# Supplementary material for: Influence of solvent structural variations on the mechanism of facilitated ion transfer into room-temperature ionic liquids
Source: Royal Society of Chemistry journal article supplement (doi:10.1039/b310507p), 2003-01-01
Supplement: b310507p.pdf [file b310507p.pdf]

Electronic Supplementary Material for *Influence of Solvent Structural Variations on the Mechanism of Facilitated Ion Transfer into Room-Temperature Ionic Liquids*. Mark L. Dietz, Julie A. Dzielawa, Ivan Laszak, Blake Young, and Mark P. Jensen

**Table S1.** Scattering path lengths and energy threshold shifts for the most important scattering paths calculated by fitting FEFF8.00 theoretical phase and amplitude functions to the  $k^3$ -weighted Sr K-edge EXAFS. Calculated uncertainties in last digit of the fit parameters are given in parentheses.

| Solvent                                                                     | Complex Species                             | Average Scattering Path Length / Å |      |          |                     |                                     | $\Delta E_0$ / eV |
|-----------------------------------------------------------------------------|---------------------------------------------|------------------------------------|------|----------|---------------------|-------------------------------------|-------------------|
|                                                                             |                                             | Sr-O                               | Sr-N | Sr-C     | Sr-C-O <sup>b</sup> | Sr-O <sub>distal</sub> <sup>c</sup> |                   |
| 1-octanol <sup>a</sup>                                                      | Sr(NO <sub>3</sub> ) <sub>2</sub> (DCH18C6) | 2.67                               | 3.06 | 3.54     | 3.86                | 4.31                                |                   |
| C <sub>5</sub> mim <sup>+</sup> Tf <sub>2</sub> N <sup>-</sup> <sup>a</sup> | Sr(DCH18C6) <sup>2+</sup>                   | 2.65                               |      | 3.55     | 3.84                |                                     |                   |
| C <sub>6</sub> mim <sup>+</sup> Tf <sub>2</sub> N <sup>-</sup>              | Sr(DCH18C6) <sup>2+</sup>                   | 2.61 (2)                           |      | 3.55 (2) | 3.86 (3)            |                                     | 9.9 (1.1)         |
| C <sub>8</sub> mim <sup>+</sup> Tf <sub>2</sub> N <sup>-</sup>              | Sr(DCH18C6) <sup>2+</sup>                   | 2.62 (2)                           |      | 3.54 (2) | 3.84 (2)            |                                     | 10.3 (9)          |
| C <sub>10</sub> mim <sup>+</sup> Tf <sub>2</sub> N <sup>-</sup>             | Sr(DCH18C6) <sup>2+</sup>                   | 2.61 (2)                           |      | 3.55 (2) | 3.83 (2)            |                                     | 9.7 (9)           |

<sup>a</sup>Reference 23

<sup>b</sup>Multiple scattering path

<sup>c</sup>Includes both single and multiple scattering paths

**Table S2.** Debye-Waller Factors for the most important scattering paths calculated by fitting FEFF8.00 theoretical phase and amplitude functions to the  $k^3$ -weighted Sr K-edge EXAFS. Calculated uncertainties in last digit of the fit parameters are given in parentheses.

| Solvent                                                                     | Complex Species                             | Debye-Waller Factor / Å <sup>-2</sup> |      |           |                     |                                     |
|-----------------------------------------------------------------------------|---------------------------------------------|---------------------------------------|------|-----------|---------------------|-------------------------------------|
|                                                                             |                                             | Sr-O                                  | Sr-N | Sr-C      | Sr-C-O <sup>b</sup> | Sr-O <sub>distal</sub> <sup>c</sup> |
| 1-octanol <sup>a</sup>                                                      | Sr(NO <sub>3</sub> ) <sub>2</sub> (DCH18C6) | 0.0136 <sup>d</sup>                   | 0.02 | 0.009     | 0.002               | 0.009                               |
| C <sub>5</sub> mim <sup>+</sup> Tf <sub>2</sub> N <sup>-</sup> <sup>a</sup> | Sr(DCH18C6) <sup>2+</sup>                   | 0.0136 <sup>d</sup>                   |      | 0.010     | 0.004               |                                     |
| C <sub>6</sub> mim <sup>+</sup> Tf <sub>2</sub> N <sup>-</sup>              | Sr(DCH18C6) <sup>2+</sup>                   | 0.0136 <sup>d</sup>                   |      | 0.011 (2) | 0.004 (4)           |                                     |
| C <sub>8</sub> mim <sup>+</sup> Tf <sub>2</sub> N <sup>-</sup>              | Sr(DCH18C6) <sup>2+</sup>                   | 0.0136 <sup>d</sup>                   |      | 0.011 (2) | 0.004 (3)           |                                     |
| C <sub>10</sub> mim <sup>+</sup> Tf <sub>2</sub> N <sup>-</sup>             | Sr(DCH18C6) <sup>2+</sup>                   | 0.0136 <sup>d</sup>                   |      | 0.011 (2) | 0.003 (3)           |                                     |

<sup>a</sup>Reference 23

<sup>b</sup>Multiple scattering path

<sup>c</sup>Includes both single and multiple scattering paths

<sup>d</sup>Fixed parameter
